# Supplementary material for: The Effects of the Ukrainian Conflict on Oncological Care: The Latest State of the Art
Source: MDPI journal article supplement (doi:10.3390/healthcare11030283), 2023-01-17
Supplement: s1 [file s1]

## Supplementary Materials

**Table S1.** Number of oncological newly registered trials active in Ukraine from 2014 to 2022 and their main characteristics. Data about incidence and mortality are taken from Bulletin of the National Cancer Registry of Ukraine. LEGEND: ND= No data; (\*) Rate per 100.000 (standardized incidence and mortality: world population).

| Year          | Total | Population<br>(million) | Incidence(*) | Mortality(*) | Trial<br>Incidence<br>ratio | Trial status                  |                   |                                   |                                  |                  |                           | Pediatric | Phase |    |    |   |                           |                          |
|---------------|-------|-------------------------|--------------|--------------|-----------------------------|-------------------------------|-------------------|-----------------------------------|----------------------------------|------------------|---------------------------|-----------|-------|----|----|---|---------------------------|--------------------------|
|               |       |                         |              |              |                             | <i>Not yet<br/>recruiting</i> | <i>Recruiting</i> | <i>Active, not<br/>recruiting</i> | <i>Suspended/<br/>Terminated</i> | <i>Completed</i> | <i>Unknown<br/>status</i> |           | 1     | 2  | 3  | 4 | <i>Not<br/>applicable</i> | <i>Not<br/>available</i> |
| 2022<br>sept. | 3     | -                       | ND           | ND           | -                           | -                             | 3                 | -                                 | -                                | -                | -                         | -         |       | 1  | 2  | - | -                         | -                        |
| 2022<br>may   | 2     | -                       | ND           | ND           | -                           | 1                             | 1                 | -                                 | -                                | -                | -                         | 1         | 0     | 0  | 2  | 0 | -                         | -                        |
| 2021          | 41    | 44.13(*)                | ND           | ND           | 0.93                        | -                             | 33                | 8                                 | -                                | -                | -                         | 1         | 1     | 11 | 29 | - | -                         |                          |
| 2020          | 44    | 44.13                   | 186.5        | 84.4         | 1.00                        | -                             | 33                | 8                                 | 2                                | 1                | 2                         | 2         | 7     | 9  | 28 | - | -                         | -                        |
| 2019          | 40    | 44.39                   | 224.2        | 92.9         | 0.90                        | -                             | 22                | 15                                | 3                                | -                | -                         | 0         | 1     | 8  | 28 | 2 | 1                         | 2                        |
| 2018          | 45    | 44.62                   | 225.0        | 96.9         | 1.01                        | -                             | 19                | 18                                | -                                | 6                | 2                         | 0         | 5     | 6  | 34 | - | 1                         | -                        |

|      |    |       |       |       |      |   |   |    |   |    |   |   |   |    |    |   |   |   |
|------|----|-------|-------|-------|------|---|---|----|---|----|---|---|---|----|----|---|---|---|
| 2017 | 47 | 44.83 | 224.3 | 100.2 | 1.05 | - | 7 | 20 | 4 | 16 | - | 3 | 8 | 13 | 30 | - | - | - |
| 2016 | 28 | 45    | 223.0 | 102.6 | 0.62 | - | 2 | 10 | 4 | 10 | 1 | 2 | 5 | 6  | 18 | - | - | - |
| 2015 | 28 | 45.15 | 225.4 | 103.3 | 0.62 | - | 3 | 10 | 1 | 12 | 2 | 3 | 2 | 8  | 21 | - | - | - |
| 2014 | 27 | 45.27 | 223.7 | 105.6 | 0.60 | - | - | 10 | - | 16 | - | 4 | 2 | 2  | 21 | - | 1 | 1 |

**Table S2.** Numbers of registered trials and their status: comparison between May and September 2022, according to geographical area and language predominance:  
LEGEND. Ukr: Ukraine language; Rus: Russian language.

| Oblast | Town      | Main<br>spoken<br>language | Area<br>s | May                       |                |                                  |               |               | September                 |                |                                  |               |               | Terminat<br>ed |
|--------|-----------|----------------------------|-----------|---------------------------|----------------|----------------------------------|---------------|---------------|---------------------------|----------------|----------------------------------|---------------|---------------|----------------|
|        |           |                            |           | Not yet<br>recruiti<br>ng | Recruiti<br>ng | Active,<br>not<br>recruiti<br>ng | Suspend<br>ed | Withdra<br>wn | Not yet<br>recruiti<br>ng | Recruiti<br>ng | Active,<br>not<br>recruiti<br>ng | Suspend<br>ed | Withdra<br>wn |                |
| Kyiv   | Kyiv      | Ukr.                       | Center    | 6                         | 20             | 4                                | 14            |               | 4                         | 17             | 12                               | 14            |               |                |
|        | Kodosivka | Ukr.                       | Center    |                           | 1              |                                  | 1             |               |                           |                | 2                                | 2             |               |                |
|        | Pliuty    | Ukr.                       | Center    | 1                         | 1              |                                  |               |               | 2                         |                | 1                                |               |               |                |
|        | Vyshhorod | Ukr.                       | Center    |                           |                |                                  |               |               |                           |                | 1                                |               |               |                |

|            |                |      |            |   |    |   |    |   |   |    |    |   |   |   |
|------------|----------------|------|------------|---|----|---|----|---|---|----|----|---|---|---|
| Odessa     | Odessa         | Rus. | Sout<br>h  | 2 | 3  | 1 | 2  |   | 1 | 3  | 3  | 3 | 1 | 1 |
| Dnipro     | Dnipro         | Rus. | Sout<br>h  | 6 | 11 | 1 | 9  |   | 4 | 9  | 9  | 8 | 1 |   |
|            | Kyryvyi Rih    | Rus. | Sout<br>h  | 1 | 6  | 1 | 4  |   | 2 | 4  | 3  | 4 |   |   |
| Mykolaiv   | Mykolaiv       | Rus. | Sout<br>h  | 1 | 1  |   |    |   | 1 | 1  |    |   |   |   |
| Charkiv    | Kharkiv        | Rus. | East       | 5 | 14 | 1 | 12 | 1 | 3 | 12 | 14 | 8 |   |   |
| Kirovograd | Kapitanivka    | Ukr. | Cent<br>er |   | 2  |   |    |   |   | 1  |    |   |   |   |
| Sumy       | Sumy           | Ukr. | Cent<br>er | 1 | 6  | 1 |    |   | 1 | 4  | 4  |   |   | 1 |
| Ternopil'  | Ternopil'      | Ukr. | West       |   | 1  |   |    |   |   | 1  | 1  |   |   |   |
| Vinnytsia  | Vinnytsia      | Ukr. | West       | 2 | 5  |   | 2  |   | 4 | 4  | 2  | 2 |   |   |
| Volyns'ka  | Lukc's         | Ukr. | West       | 1 | 5  | 1 | 2  |   | 1 | 5  | 3  | 3 |   |   |
| Lviv       | Lviv           | Ukr. | West       | 1 | 4  |   | 4  |   |   | 4  | 4  | 4 |   |   |
| Zaporižžja | Zaporižžja     | Ukr. | Sout<br>h  | 3 | 4  |   | 4  |   | 2 | 4  | 1  | 3 |   | 3 |
| Kirovohrad | Kirovohrad     | Ukr. | Cent<br>er |   | 3  |   | 2  |   |   | 4  | 1  | 6 | 1 |   |
| Černivci   | Černivci       | Ukr. | West       |   |    |   | 2  |   |   | 3  | 2  | 4 |   |   |
| Poltava    | Poltava        | Ukr. | Cent<br>er |   | 1  |   | 1  |   |   | 1  |    |   |   |   |
|            | Kremenchu<br>k | Ukr. | Cent<br>er |   |    |   | 1  |   |   |    |    | 1 |   |   |

|                 |                 |      |        |   |   |   |   |   |   |
|-----------------|-----------------|------|--------|---|---|---|---|---|---|
| Žytomyr         | Žytomyr         | Ukr. | Center | 1 | 2 | 1 | 2 |   |   |
| Ivano-Frankivsk | Ivano-Frankivsk | Ukr. | West   | 1 | 6 | 3 | 6 | 1 |   |
| Zakarpats'ka    | Uzhgorod        | Ukr. | West   | 1 | 3 | 1 | 2 | 3 | 1 |
| Cherkasy        | Cherkasy        | Ukr. | Center | 3 | 3 | 1 | 1 | 2 |   |
| Cherson         | Cherson         | Ukr. | South  | 1 | 1 | 1 | 1 | 1 |   |
| Černihiv        | Černihiv        | Ukr. | Center | 4 | 5 | 1 | 7 | 1 | 9 |
| Chmel'nyckyj    | Chmel'nyckyj    | Ukr. | West   | 2 | 1 | 2 | 1 | 1 |   |

**Table S3.** Numbers of registered trials and their status: comparison between May and September 2022 according to trial status.

|                  | Russian language |           |           |            | Ukrainian language |           |           |            |
|------------------|------------------|-----------|-----------|------------|--------------------|-----------|-----------|------------|
|                  | Active           | Suspended | Withdrawn | Terminated | Active             | Suspended | Withdrawn | Terminated |
| <b>May</b>       | 54               | 27        | 1         | 0          | 91                 | 52        | 0         | 0          |
| <b>September</b> | 69               | 23        | 2         | 1          | 112                | 58        | 0         | 14         |
|                  | Centre           |           |           |            | West               |           |           |            |
| <b>May</b>       | 55               | 29        | 0         | 0          | 27                 | 18        | 0         |            |

|                  |            |    |   |   |              |    |   |   |
|------------------|------------|----|---|---|--------------|----|---|---|
| <b>September</b> | 59         | 34 | 2 | 9 | 4            | 21 | 1 | 1 |
|                  | <b>Est</b> |    |   |   | <b>South</b> |    |   |   |
| <b>May</b>       | 32         | 12 | 1 | 0 | 43           | 20 | 0 | 0 |
| <b>September</b> | 29         | 8  | 0 | 0 | 49           | 18 | 3 | 4 |
